# Supplementary material for: Terephthalaldehyde–Phenolic Resins as a Solid-Phase Extraction System for the Recovery of Rare-Earth Elements
Source: MDPI journal article supplement (doi:10.3390/polym14020311), 2022-01-13

## Supporting information

### Terephthalaldehyde–Phenolic Resins as a Solid-Phase Extraction System for the Recovery of Rare-Earth Elements

Ruth Oye Auke,<sup>1</sup> Guilhem Arrachart,<sup>1,\*</sup> Romain Tavernier,<sup>2</sup> Ghislain David<sup>2</sup> and Stéphane Pellet-Rostaing<sup>1</sup>

<sup>1</sup> ICSM, Univ Montpellier, CEA, CNRS, ENSCM, 30207 Marcoule, France

<sup>2</sup> ICGM, Univ Montpellier, CNRS, ENSCM, 34095 Montpellier, France

corresponding author : email: [guilhem.arrachart@umontpellier.fr](mailto:guilhem.arrachart@umontpellier.fr) ; phone : +33 4 66 79 15 68  
<https://orcid.org/0000-0002-5277-3967>

Figure S1: DSC thermograms recorded during the prepolymer RTPA 0.4 curing

Table S1: Total enthalpy of cross-linking values and temperature onset of the exothermic peaks

Table S2: First weight loss corresponding to the percentage of water in the polymer

Table S3: Thermal properties of polymers

Figure S2: FT-IR spectra of RTPA 1 after chemical treatment in HNO<sub>3</sub>

Figure S3: SEM of RTPA 1 before and after contacting with 2M HNO<sub>3</sub>

Table S4: Theoretical ion exchange capacity of the resins

Figure S4: X-EDS analysis after extraction of Eu 100mg/L (pH = 4) by resin RTPA 1

Figure S5: Extraction and back extraction of Eu by resin RTPA 1. RTPA 1.25 and RTPA 1.5 from mixed cation solutions with each cation at nominal 50 mg/L concentration (pH=4)

Figure S6: Extraction of Eu by resin RTPA 1. RTPA 1.25 and RTPA 1.5 from cation solutions at various concentrations (pH = 4)

Table S5: Langmuir parameters

Figure S7: Extraction kinetics of Eu by resin RTPA 1. RTPA 1.25 and RTPA 1.5

Figure S1: DSC thermograms recorded during the prepolymer RTPA 0.4 curing

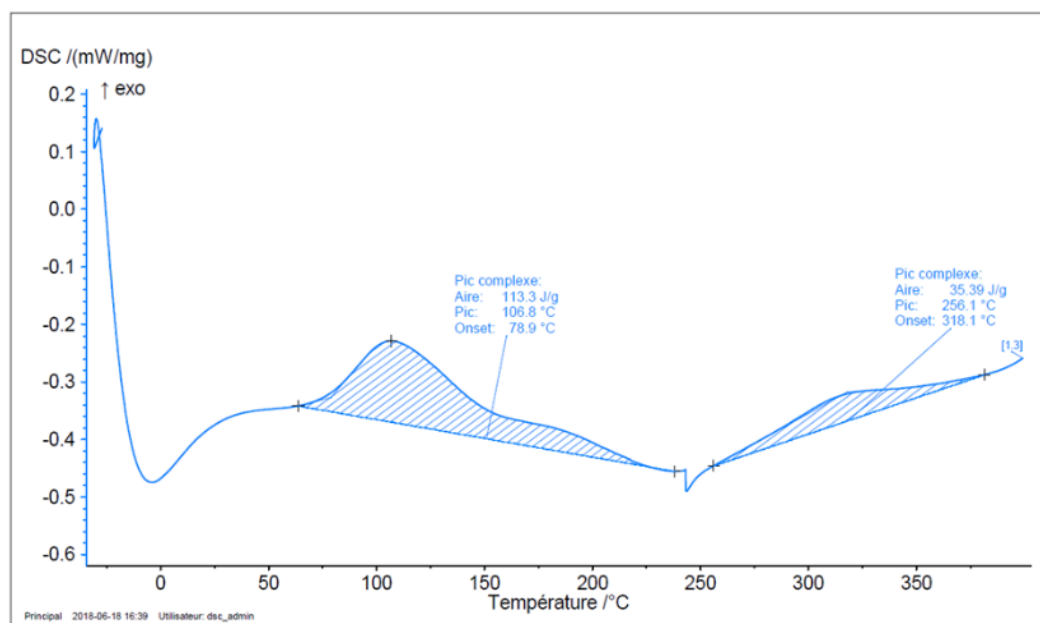

Table S1: Total enthalpy of cross-linking values and temperature onset of the exothermic peaks

| Resin        | Molar ratio<br>Resorcinol / TPA<br>(eq) | Enthalpie (J/g) |             | T <sub>ONSET</sub> (°C) |             |
|--------------|-----------------------------------------|-----------------|-------------|-------------------------|-------------|
|              |                                         | First peak      | Second peak | First peak              | Second peak |
| RTPA 0.4     | 1:0.4                                   | 113             | 35          | 79                      | 318         |
| RTPA 0.5 (b) | 1:0.5                                   | 87              | 10          | 83                      | 252         |
| RTPA 0.75    | 1:0.75                                  | 71              | 91          | 83                      | 272         |
| RTPA 1       | 1:1                                     | 80              | 96          | 87                      | 270         |
| RTPA 1.25    | 1:1.25                                  | 61              | 116         | 98                      | 251         |

Table S2: First weight loss corresponding to the percentage of water in the polymer

| Resin     | Initial weight (mg) | Percentage of resin after isothermal treatment at 100°C | % weight loss |
|-----------|---------------------|---------------------------------------------------------|---------------|
| RTPA 1    | 28.9                | 95.3301                                                 | 4.6699        |
| RTPA 1.25 | 22.8                | 97.6195                                                 | 2.3805        |
| RTPA 1.5  | 26.3                | 98.0164                                                 | 1.9836        |

Table S3: Thermal properties of polymers

| Resin     | Weight loss after isothermal treatment | T <sub>d10%</sub> | T <sub>d30%</sub> | Char yields (%) |
|-----------|----------------------------------------|-------------------|-------------------|-----------------|
| RTPA 1    | 3.4                                    | 426               | 599               | 61              |
| RTPA 1.25 | 2.0                                    | 420               | 569               | 59              |
| RTPA 1.5  | 1.2                                    | 415               | 555               | 57              |

Figure S2: FT-IR spectra of RTPA 1 after chemical treatment in HNO<sub>3</sub>

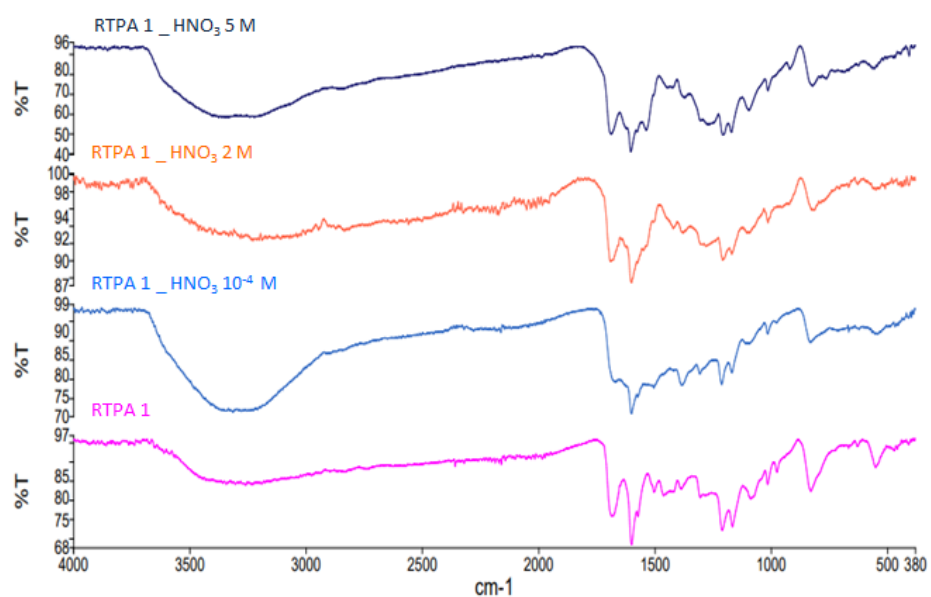

Figure S3: SEM of RTPA 1 before and after contacting with 2M HNO<sub>3</sub>

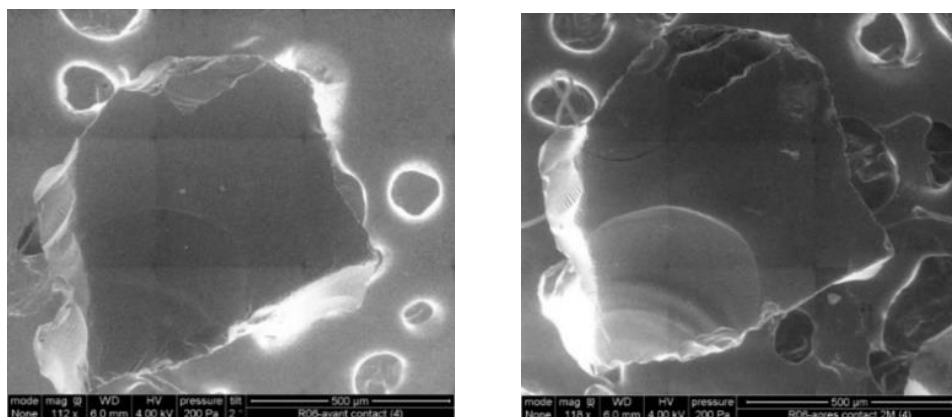

Table S4: Theoretical ion exchange capacity of the resins

| Resin     | Lanthanide | Ion exchange capacity<br>(Eq of Na <sup>+</sup> / g<br>of resin) | Ion exchange capacity<br>(mmol of Na <sup>+</sup> /<br>g of resin) | Ion exchange capacity<br>(mg of Ln / g of resin) |
|-----------|------------|------------------------------------------------------------------|--------------------------------------------------------------------|--------------------------------------------------|
| RTPA 1    | Dy         | 0.293                                                            | 2.93                                                               | 476                                              |
|           | Eu         |                                                                  |                                                                    | 445                                              |
|           | La         |                                                                  |                                                                    | 407                                              |
|           | Nd         |                                                                  |                                                                    | 423                                              |
|           | Yb         |                                                                  |                                                                    | 507                                              |
| RTPA 1.25 | Dy         | 0.293                                                            | 2.93                                                               | 476                                              |
|           | Eu         |                                                                  |                                                                    | 445                                              |
|           | La         |                                                                  |                                                                    | 407                                              |
|           | Nd         |                                                                  |                                                                    | 423                                              |
|           | Yb         |                                                                  |                                                                    | 507                                              |
| RTPA 1.5  | Dy         | 0.296                                                            | 2.96                                                               | 481                                              |
|           | Eu         |                                                                  |                                                                    | 450                                              |
|           | La         |                                                                  |                                                                    | 411                                              |
|           | Nd         |                                                                  |                                                                    | 427                                              |
|           | Yb         |                                                                  |                                                                    | 512                                              |

Figure S4: X-EDS analysis after extraction of Eu 100mg/L (pH = 4) by resin RTPA 1

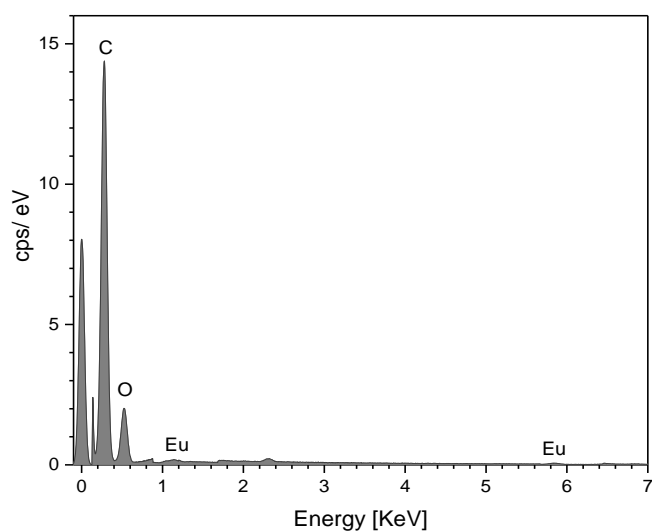

Figure S5: Extraction and back extraction of Eu by resin RTPA 1. RTPA 1.25 and RTPA 1.5 from mixed cation solutions with each cation at nominal 50 mg/L concentration (pH=4)

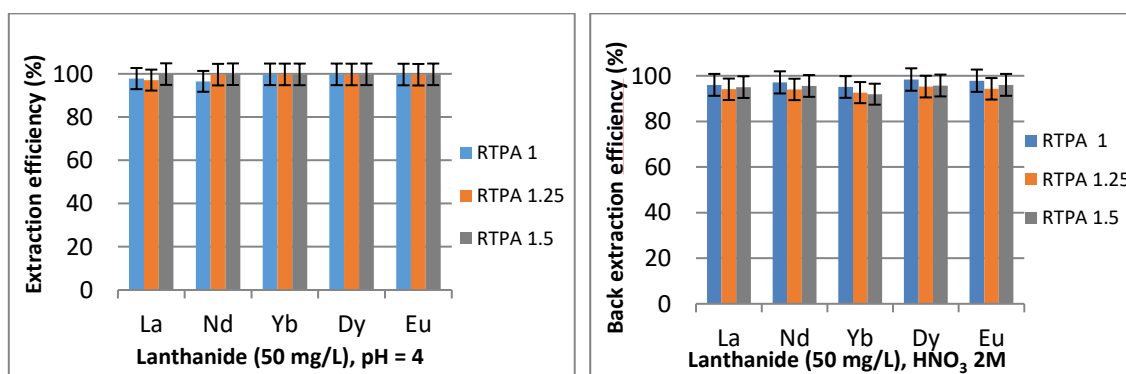

Figure S6: Extraction of Eu by resin RTPA 1. RTPA 1.25 and RTPA 1.5 from cation solutions at various concentrations (pH = 4)

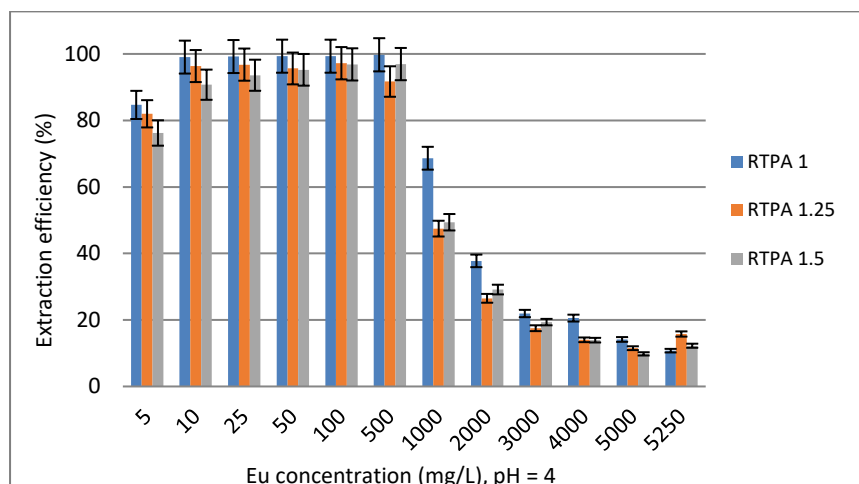

Table S5: Langmuir parameters

| Resin     | R <sup>2</sup> | Q <sub>max</sub> (mg/g) | K (L/mg)              |
|-----------|----------------|-------------------------|-----------------------|
| RTPA 1    | 0.993          | 66                      | 8.94*10 <sup>-2</sup> |
| RTPA 1.25 | 0.9982         | 52                      | 2.91*10 <sup>-2</sup> |
| RTPA 1.5  | 0.9957         | 58                      | 1.73*10 <sup>-2</sup> |

Figure S7: Extraction kinetics of Eu by resin RTPA 1. RTPA 1.25 and RTPA 1.5.

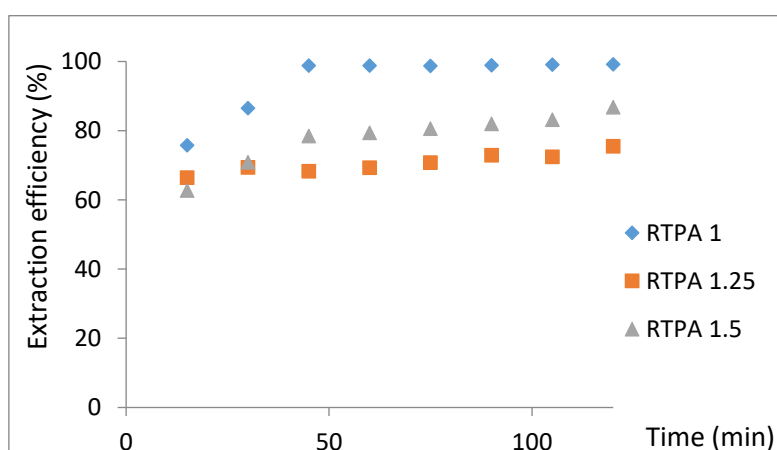

Supplement: s1 [file s1]
